# Supplementary material for: Differences in the immunosurveillance pattern associated with DNA mismatch repair status between right‐sided and left‐sided colorectal cancer
Source: PubMed Central journal article supplement — Cancer Sci. 2020 Jul 20;111(8):3032–44. doi: 10.1111/cas.14495 (PMC7419035; doi:10.1111/cas.14495), 2020-07-20
Supplement: CAS-111-3032-s001.pdf [file CAS-111-3032-s001.pdf]

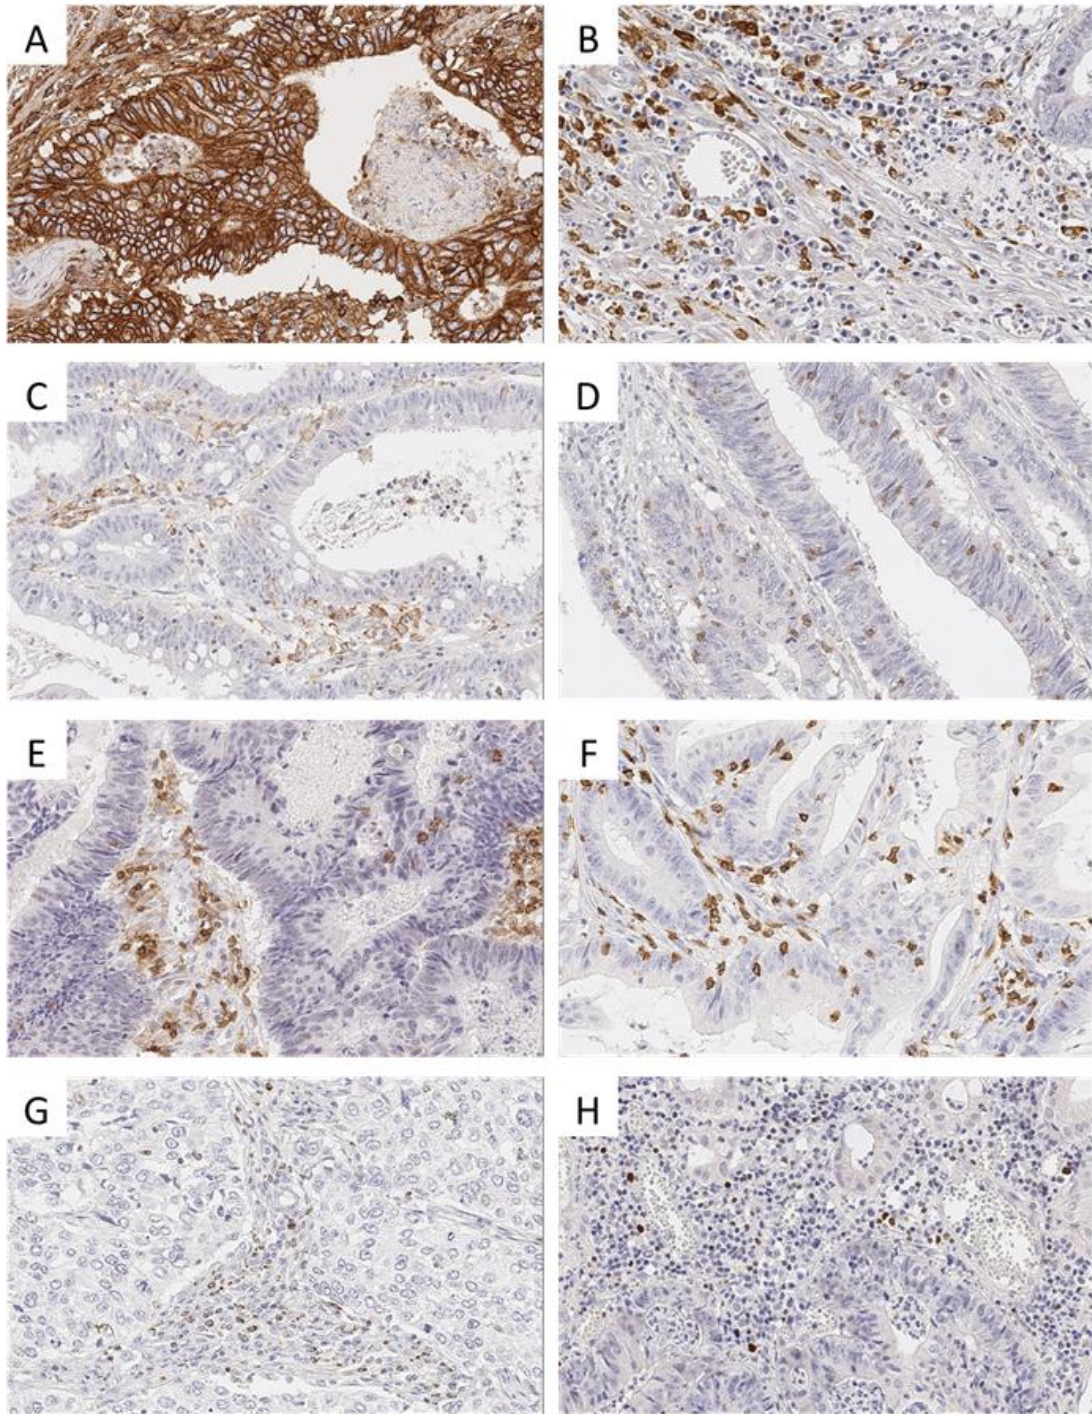

**Figure S1.** Representative images. (A) HLA class I, (B) CD163, (C) PD-L1 on the stromal cells, (D) CD4, (E) CD8, (F) TIA-1, and (G) ROR $\gamma$ T ( $\times 400$ ).
