# Supplementary material for: Differences in the immunosurveillance pattern associated with DNA mismatch repair status between right‐sided and left‐sided colorectal cancer
Source: PubMed Central journal article supplement — Cancer Sci. 2020 Jul 20;111(8):3032–44. doi: 10.1111/cas.14495 (PMC7419035; doi:10.1111/cas.14495), 2020-07-20
Supplement: CAS-111-3032-s002.pdf [file CAS-111-3032-s002.pdf]

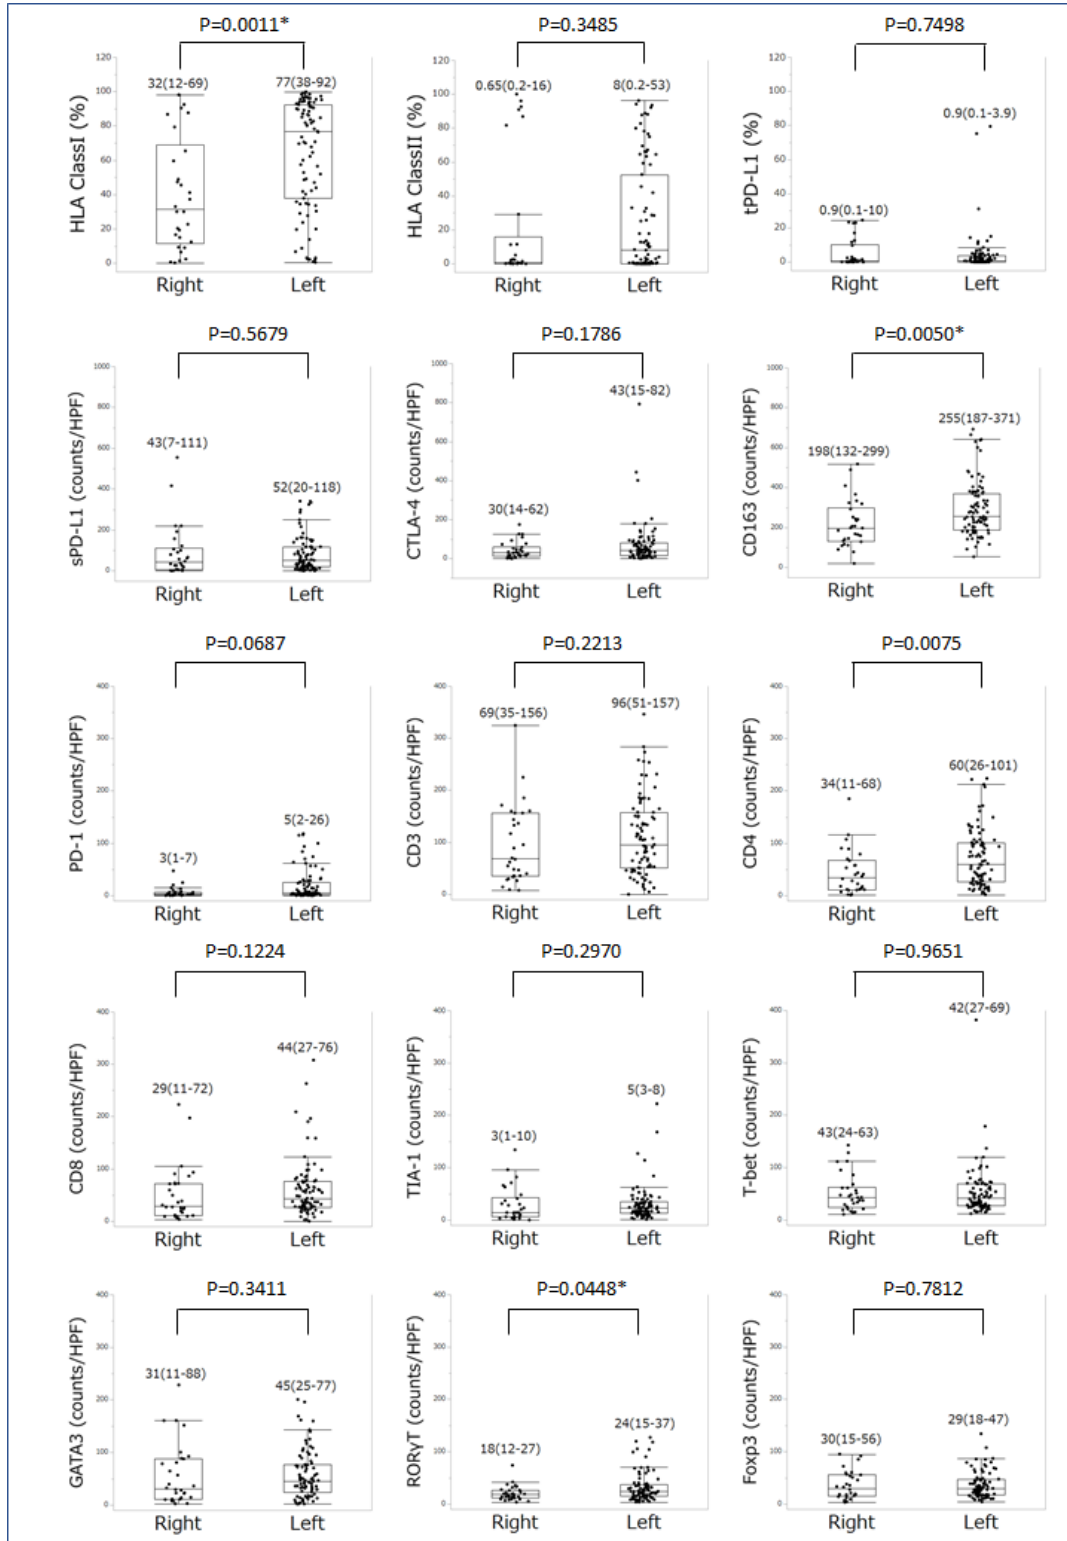

**Figure S2.** Molecular expression rate/number in the right- and left-sided tumors. The numbers above each plot represent the median and interquartile range.
