# Supplementary material for: Differences in the immunosurveillance pattern associated with DNA mismatch repair status between right‐sided and left‐sided colorectal cancer
Source: PubMed Central journal article supplement — Cancer Sci. 2020 Jul 20;111(8):3032–44. doi: 10.1111/cas.14495 (PMC7419035; doi:10.1111/cas.14495), 2020-07-20
Supplement: CAS-111-3032-s005.pdf [file CAS-111-3032-s005.pdf]

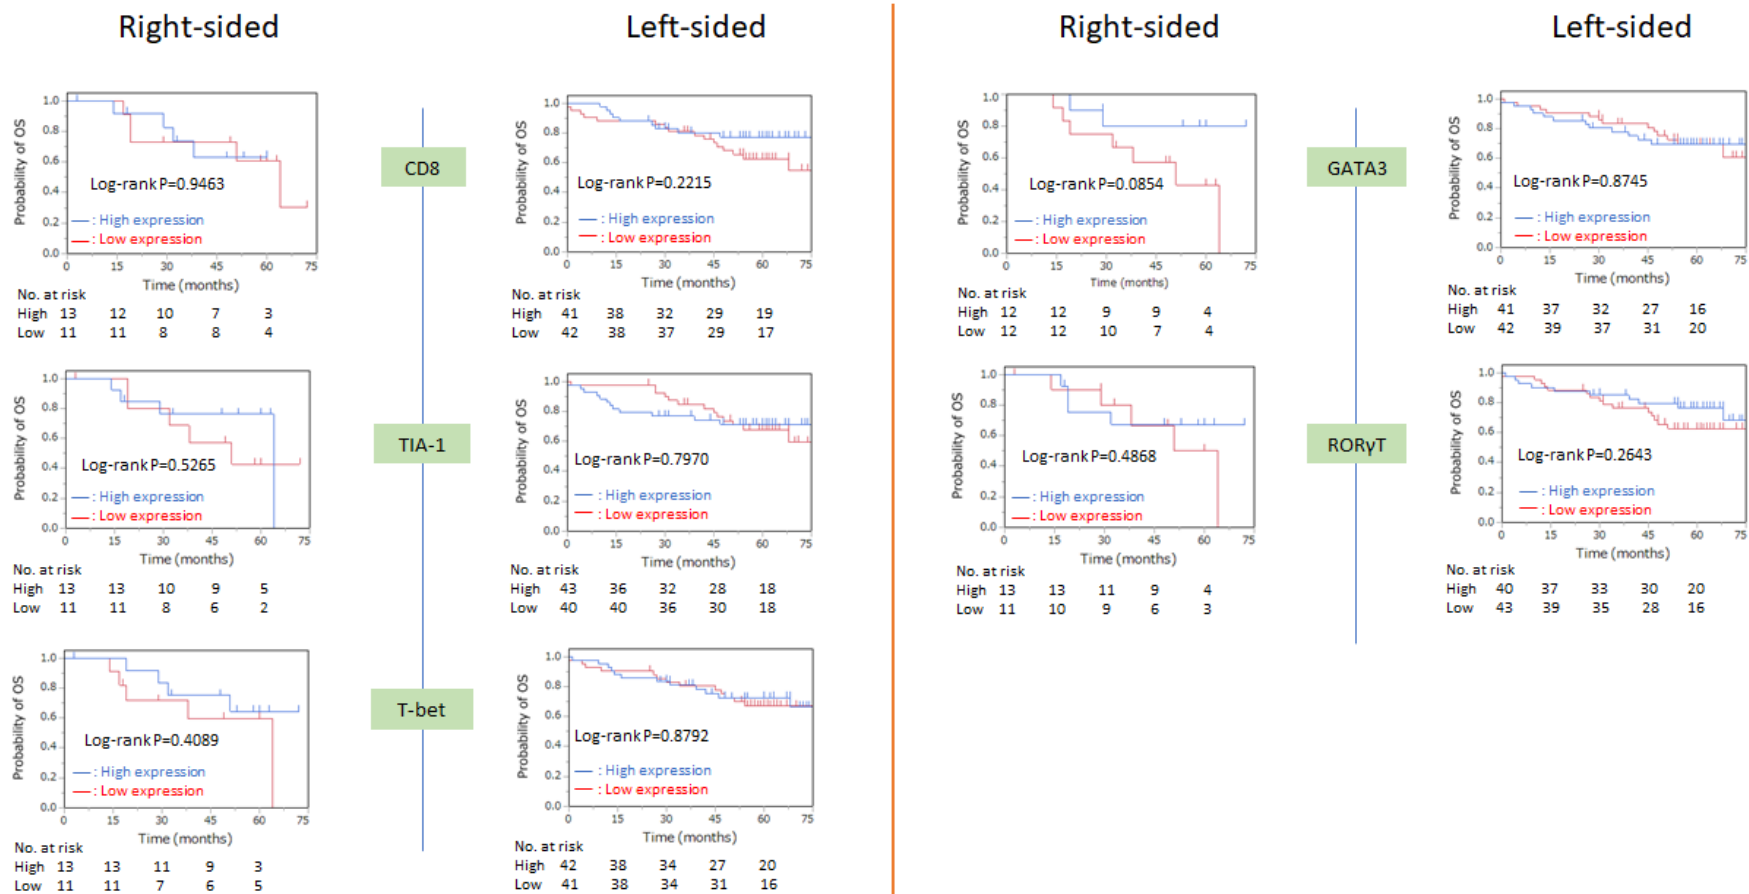

**Figure S9.** Kaplan-Meier curves of overall survival (OS) according to tumor sidedness, excluding MMR deficiency, based on the molecular expression of CD8, TIA-1, T-bet, GATA3, and RORγT. The median values were used as the cut-off point.
