# Supplementary material for: Differences in the immunosurveillance pattern associated with DNA mismatch repair status between right‐sided and left‐sided colorectal cancer
Source: PubMed Central journal article supplement — Cancer Sci. 2020 Jul 20;111(8):3032–44. doi: 10.1111/cas.14495 (PMC7419035; doi:10.1111/cas.14495), 2020-07-20
Supplement: CAS-111-3032-s011.pdf [file CAS-111-3032-s011.pdf]

**Table S1.** Relationship between tumor location and clinicopathological characteristics of the 117 colorectal cancer patients

| Characteristic (n=117)             | Right-sided (n=30) | %   | Left-sided (n=87) | %   | Total | P-value |
|------------------------------------|--------------------|-----|-------------------|-----|-------|---------|
| <b>Sex</b>                         |                    |     |                   |     |       | 0.5119  |
| Male                               | 18                 | 60% | 58                | 67% | 76    |         |
| Female                             | 12                 | 40% | 29                | 33% | 41    |         |
| <b>Age (years), median (range)</b> | 76 (46-86)         |     | 68 (29-89)        |     |       | 0.0360* |
| ≤70                                | 12                 | 40% | 54                | 62% | 66    |         |
| >70                                | 18                 | 60% | 33                | 38% | 51    |         |
| <b>Tumor depth</b>                 |                    |     |                   |     |       | 0.8970  |
| T1-2                               | 3                  | 10% | 8                 | 9%  | 11    |         |
| T3-4                               | 27                 | 90% | 79                | 91% | 106   |         |
| <b>Lymph node metastasis</b>       |                    |     |                   |     |       | 0.0078* |
| Negative                           | 23                 | 77% | 43                | 49% | 66    |         |
| Positive                           | 7                  | 23% | 44                | 51% | 51    |         |
| <b>Tumor differentiation</b>       |                    |     |                   |     |       | 0.4757  |
| Well/moderate                      | 25                 | 83% | 77                | 89% | 102   |         |
| Others                             | 5                  | 17% | 10                | 11% | 15    |         |
| <b>Lymphatic invasion</b>          |                    |     |                   |     |       | 0.2191  |
| Negative                           | 17                 | 57% | 38                | 44% | 55    |         |
| Positive                           | 13                 | 43% | 49                | 56% | 62    |         |
| <b>Venous invasion</b>             |                    |     |                   |     |       | 0.7832  |
| Negative                           | 8                  | 27% | 21                | 24% | 29    |         |
| Positive                           | 22                 | 73% | 66                | 76% | 88    |         |
| <b>Perineural invasion</b>         |                    |     |                   |     |       | 0.2421  |
| Negative                           | 26                 | 87% | 67                | 77% | 93    |         |
| Positive                           | 4                  | 13% | 20                | 23% | 24    |         |
| <b>Mismatch repair</b>             |                    |     |                   |     |       | 0.0157* |
| Dificient                          | 6                  | 20% | 4                 | 5%  | 10    |         |
| Proficient                         | 24                 | 80% | 83                | 95% | 107   |         |
| <b>Adjuvant chemotherapy</b>       |                    |     |                   |     |       | 0.0885  |
| No                                 | 23                 | 77% | 52                | 60% | 75    |         |
| Yes                                | 7                  | 23% | 35                | 40% | 42    |         |
| <b>Recurrence</b>                  |                    |     |                   |     |       | 0.8956  |
| No                                 | 8                  | 27% | 24                | 28% | 33    |         |
| Yes                                | 22                 | 73% | 63                | 72% | 84    |         |
